# Supplementary material
Source: PubMed Central journal article supplement (PMC3690171)
Supplement: NIHMS444115-supplement-01.pdf [file NIHMS444115-supplement-01.pdf]

**Supplemental Table 1. Primer sequences used in real-time PCR analysis**

| Gene Name (Ensembl ID #)                               | Sequences                                                                                          |
|--------------------------------------------------------|----------------------------------------------------------------------------------------------------|
| <i>L7a</i> ( <a href="#">ENSRNOT00000006754</a> )      | Forward, 5'- GAGGCCAAAAAGGTGGTCAATCC -3'<br>Reverse, 5'- CCTGCCCAATGCCGAAGTTCT -3'                 |
| <i>Dkk1</i> ( <a href="#">ENSRNOE00000110838</a> )     | Forward, 5'- ATGCCCTCTGACCACAGCCATT -3'<br>Reverse, 5'- CACCGTGGTCATTGCCAAGGT-3'                   |
| <i>Lxra</i> ( <a href="#">ENSRNOE00000127993</a> )     | Forward, 5'- GCAGTGTATGTGGGGACAAGGC-3'<br>Reverse, 5'- GATGACACTGCCGGCGGAAGA-3'                    |
| <i>Ppara</i> ( <a href="#">ENSRNOE00000209259</a> )    | Forward, 5'- ATGGCTGAGAAGACGCTTGTGG -3'<br>Reverse, 5'- TCGGACCTCTGCCTCCTTGTT -3'                  |
| <i>Adrp</i> ( <a href="#">ENSRNOE00000065739</a> )     | Forward, 5'- CCGTAACTGGGGCAAAGGATGT-3'<br>Reverse, 5'- TGCTGGCTACAGAATCCTTGGC-3'                   |
| <i>Srebp-1c</i> ( <a href="#">ENSRNOE00000310938</a> ) | Forward, 5'- GCTTCTCTGGGCTCCTCTCTGG-3'<br>Reverse, 5'- CAGTGGGTGCCGATGGTGG -3'                     |
| <i>Wnt1</i> ( <a href="#">ENSRNOE00000140284</a> )     | Forward, 5'- CCCCCTGACCTCTCTGTGTATCAC-3'<br>Reverse, 5'- TGAAGCCCAGGTGTGGTGGTT-3'                  |
| <i>Wnt2</i> ( <a href="#">ENSRNOE00000010427</a> )     | Forward, 5'- ACCTGATGTAGACGC AAG GGG G-3'<br>Reverse, 5'- AGG TCA AGA GCA GAG GGA GCC A-3'         |
| <i>Wnt2b</i> ( <a href="#">ENSRNOE00000137572</a> )    | Forward, 5'- ACC CAG ACA TCA TGC GCT CAG TAG-3'<br>Reverse, 5'- ACG GAA CTG GTG TTG ACA CTC TCG-3' |
| <i>Wnt3a</i> ( <a href="#">ENSRNOE00000323822</a> )    | Forward, 5'- CAA GGC GGG CAT CCA AGA GT-3'<br>Reverse, 5' CTG TTG CTG ACA GTG GTG CAG TTC -3'      |
| <i>Wnt4</i> ( <a href="#">ENSRNOE 00000018064</a> )    | Forward, 5'- TGT CTT CGG GAA GGT GGT GAC AC-3'<br>Reverse, 5'- CAA AGG CCA CAC CTG CTG AAG AG-3'   |
| <i>Wnt8b</i> ( <a href="#">ENSRNOE00000132073</a> )    | Forward, 5'- GGC AAT TTC CAA GCA GTT TGT GG-3'<br>Reverse, 5'- TCG TTG TTG TGC AGA TTC ATG GC-3'   |
| <i>Wnt9a</i> ( <a href="#">ENSRNOE00000445728</a> )    | Forward, 5'- CGC AGG TGT CAC CGA GAG AAG A-3'<br>Reverse, 5'- TGT CAC CAC ACG GCT CTG TGT G-3'     |
| <i>Wnt9b</i> ( <a href="#">ENSRNOE00000035906</a> )    | Forward, 5'- CACGGCTGTCAAAGTGTCCAGTG-3'<br>Reverse, 5'- CACCAGGTTTTGCAGGTACCCAC-3'                 |
| <i>Wnt11</i> ( <a href="#">ENSRNOE00000434171</a> )    | Forward, 5'- CCC TGG AAA CGA AGT GTA AGT GCC-3'<br>Reverse, 5'- GAG CTC TTG TAG CCC CTT CCA ACA-3' |
| <i>sfrp1</i> ( <a href="#">ENSRNOE00000170873</a> )    | Forward, 5'- TCC TAT CAG AGC GGG CGC TT-3'<br>Reverse, 5'- TGT GGC ACA GCC GCA GGT-3'              |
| <i>sfrp2</i> ( <a href="#">ENSRNOE00000012658</a> )    | Forward, 5'- TGC CAC GGC ATC GAG TAC CA-3'<br>Reverse, 5'- GCT CCA GCA CCT CCT TCA TGG T-3'        |
| <i>sfrp4</i> ( <a href="#">ENSRNOT00000183030</a> )    | Forward, 5'- ACT GCG AGC CCC TCA TGA AGA T-3'<br>Reverse, 5'- ACG GTC ATA GAC AGG CAG CTC ATC-3'   |
| <i>Sfrp5</i> ( <a href="#">ENSRNOE00000143167</a> )    | Forward, 5'- TCC TAC TCC AAG CCA CCG CAG T-3'<br>Reverse, 5'- ATG CGC TTG TAG CCC ACT GTG T-3'     |

**Supplemental Table 2. Statistical analysis of interactions between diet and genotype**

|                                | Main Effects (P values)     |                         |                    |
|--------------------------------|-----------------------------|-------------------------|--------------------|
|                                | Genotype<br>(lean vs obese) | Diet<br>(casein vs soy) | Genotype<br>x diet |
| <b>Histology Evaluation</b>    |                             |                         |                    |
| Hepatocellular vacuolation     | <0.0001                     | 0.035                   | 0.199              |
| <b>Liver functions</b>         |                             |                         |                    |
| AST                            | <0.0001                     | 0.050                   | 0.087              |
| ALT                            | <0.0001                     | 0.842                   | 0.488              |
| <b>Lipid Profile</b>           |                             |                         |                    |
| ORO quantification             | <0.0001                     | 0.011                   | 0.018              |
| NEFA                           | 0.0053                      | 0.055                   | 0.467              |
| TAG                            | <0.0001                     | 0.098                   | 0.094              |
| <b>Transcript</b>              |                             |                         |                    |
| <i>LXR<math>\alpha</math></i>  | 0.0797                      | 0.7709                  | 0.9798             |
| <i>PPAR<math>\alpha</math></i> | 0.0043                      | 0.9382                  | 0.6418             |
| <i>SREBP1-c</i>                | <0.0001                     | 0.0136                  | 0.3549             |
| <i>ADRP</i>                    | <0.0001                     | 0.0657                  | 0.0705             |
| <i>Wnt 1</i>                   | 0.9829                      | 0.1616                  | 0.213              |
| <i>Wnt 2</i>                   | 0.0023                      | 0.2549                  | 0.3045             |
| <i>Wnt 2b</i>                  | 0.9956                      | 0.0889                  | 0.0997             |
| <i>Wnt 3a</i>                  | 0.7305                      | 0.7583                  | 0.3423             |
| <i>Wnt 4</i>                   | 0.0331                      | 0.0172                  | 0.0072             |
| <i>Wnt 8b</i>                  | 0.2954                      | 0.1887                  | 0.1452             |
| <i>Wnt 9a</i>                  | 0.0012                      | 0.0215                  | 0.2375             |
| <i>Wnt 9b</i>                  | 0.0121                      | 0.9095                  | 0.0078             |
| <i>Wnt 11</i>                  | 0.8988                      | 0.8331                  | 0.0259             |
| <i>SFRP 1</i>                  | 0.6128                      | 0.6892                  | 0.0547             |
| <i>SFRP 2</i>                  | 0.3237                      | 0.3668                  | 0.3898             |
| <i>SFRP 4</i>                  | 0.0147                      | 0.3557                  | 0.0562             |
| <i>SFRP 5</i>                  | 0.289                       | 0.6599                  | 0.0479             |
| <i>DKK1</i>                    | 0.3211                      | 0.2491                  | 0.1044             |
| <b>Western blot</b>            |                             |                         |                    |
| $\beta$ -catenin               | 0.0576                      | 0.1183                  | 0.0032             |
| P- $\beta$ -catenin            | 0.034                       | 0.0139                  | 0.4996             |
